# Competition between action plans tracks with evidence accumulation during flexible decision-making

Krista Bond<sup>1,2,3\*</sup>, Javier Rasero<sup>1</sup>, Raghav Madan<sup>4</sup>, Jyotika Bahuguna<sup>1</sup>, Jonathan Rubin<sup>2,5</sup>, and Timothy Verstynen<sup>1,2,3,6\*</sup>

<sup>1</sup>Department of Psychology, Carnegie Mellon University, United States; <sup>2</sup>Center for the Neural Basis of Cognition, United States; <sup>3</sup>Carnegie Mellon Neuroscience Institute, United States; <sup>4</sup>Department of Biomedical and Health Informatics, School of Medicine, University of Washington, United States; <sup>5</sup>Department of Mathematics, University of Pittsburgh, United States; <sup>6</sup>Department of Biomedical Engineering, Carnegie Mellon University, United States

This manuscript was compiled on October 3, 2022

**The ability to change your mind when the local environment changes relies critically on cortico-basal ganglia-thalamic (CBGT) circuits. *In silico* experiments on the CBGT pathways show how shifts in decision policy are driven by learning-induced changes in competition between action plans, both within and across action representations. We empirically validate this idea, using whole-brain hemodynamic imaging in *homo sapiens* to show how competition between action representations in CBGT circuits adaptively shifts the rate of evidence accumulation in response to action-outcome contingency changes.**

uncertainty | exploration | cortico-basal ganglia-thalamic network

Choice is fundamentally driven by information. The process of deciding between available actions is continually updated using incoming sensory signals, processed at a given accumulation rate, until sufficient evidence is reached to trigger one action over the other (1, 2). The parameters of this evidence accumulation process are also highly plastic, adjusting to both the reliability of sensory signals (3–7) and previous choice history (8–13), to balance the speed of a given decision with local demands to choose the right action.

We recently showed that when action-outcome contingencies shift, forcing a change-of-mind as to what is the most rewarding action, humans dynamically reduce the rate at which evidence accumulates (drift-rate,  $v$ , in a normative drift diffusion model, DDM (2)) and sometimes also increase the threshold of evidence needed to trigger an action (boundary height,  $a$ ) (7). This pushes the decision policy into a slow, exploratory state. Over time feedback-learning pushes the system back into an exploitative state until the environment changes again (see also (11) and (12)).

Here we explore the underlying neural mechanisms that drive dynamic decision policies. We start with a set of theoretical experiments, using biologically realistic spiking network models, to test how the cortico-basal ganglia-thalamic (CBGT) circuits influence the evidence accumulation process (14–18). These experiments both explain previous results (7) and make specific predictions as to how competition between action representations drives changes in the decision policy. We then test these predictions in humans using a high-powered, within-participant neuroimaging design, collecting data over thousands of trials where action-outcome contingencies change on a semi-random basis.

## Results

**CBGT circuits can control decision parameters under uncertainty.** Both theoretical (9, 12, 14, 19–21) and experimental (18) evidence suggest that the CBGT circuits play a critical

role in the evidence accumulation process (for a review see (22)). The canonical CBGT circuit (Fig. 1A) includes two dissociable control pathways: the direct (facilitation) and indirect (suppression) pathways (23, 24). A critical assumption of the canonical model is that the basal ganglia are organized into multiple "channels" mapped to specific action representations (25, 26), each containing a direct and indirect pathway. While a strict, segregated action channel organization may not accurately reflect the true underlying circuitry, striatal neurons have been shown to organize into task-specific spatiotemporal assemblies that qualitatively reflect independent action representations (27–31). Within these action channels, activation of the direct pathway, via cortical excitation of D1-expressing spiny projection neurons (SPNs) in the striatum, releases GABAergic signals that can suppress activity in the CBGT output nucleus (internal segment of the globus pallidus, GPi, in primates or substantia nigra pars reticulata, SNr, in rodents) (26, 32–34). This relieves the thalamus from tonic inhibition, thereby exciting postsynaptic cortical cells and facilitating action execution. Conversely, activation of the indirect pathway via D2-expressing SPNs in the striatum controls firing in the external segment of the globus pallidus (GPe) and the subthalamic nucleus (STN), resulting in strengthened basal ganglia inhibition of the thalamus. This weakens drive to postsynaptic cortical cells and reduces the likelihood that an action is selected in cortex.

### Significance Statement

The world changes. Therefore, successful adaptation requires flexible decision making, and the knowledge that the world shifts should be taken into consideration when we weigh the evidence for staying with what we know against that for exploring new options. Using simulations and high-powered human neuroimaging, we show that a change in the best choice induces competition between action plans, slowing evidence accumulation to promote adaptive exploration.

Author contributions: K.B.: Conceptualization, Data curation, Formal analysis, Investigation, Methodology, Project administration, Software, Visualization, Writing - original draft, Writing - review and editing;

JR: Formal analysis, Software, Visualization, Writing - original draft, Writing - review and editing;

RM: Data curation, Formal analysis, Software, Writing - review and editing;

JB: Formal analysis, Software, Writing - review and editing;

JR: Conceptualization, Writing - review and editing;

TV: Conceptualization, Formal analysis, Funding acquisition, Investigation, Project administration, Resources, Supervision, Validation, Writing - review and editing

The authors declare no competing interests.

\* Address correspondence to [kbond@andrew.cmu.edu](mailto:kbond@andrew.cmu.edu) & [timothyv@andrew.cmu.edu](mailto:timothyv@andrew.cmu.edu)

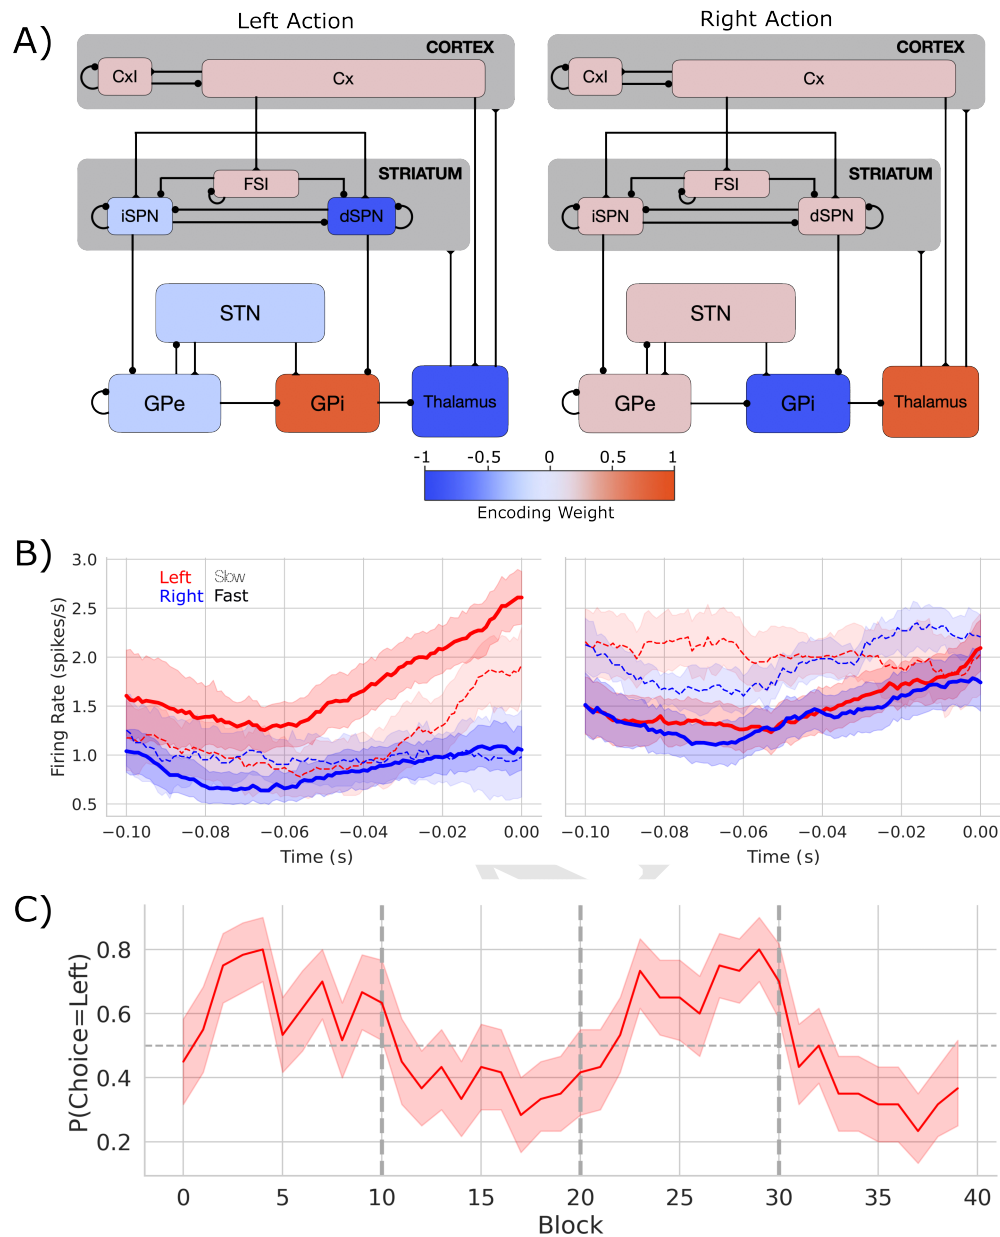

**Fig. 1. Biologically based CBGT network dynamics and behavior.** A) Each CBGT nucleus is organized into left and right action channels with the exception of a common population of striatal fast spiking interneurons (FSIs) and another of cortical interneurons (CxI). Values show encoded weights for a left action. Network schematic adapted from (19). B) Firing rate profiles for D1-SPNs (left panel) and D2-SPNs (right panel) prior to stimulus onset (t=0) for a left choice. D1-SPN activity in left and right channels is shown in red and blue, respectively. Thick solid lines represent fast trials (short RTs) and thin dashed lines represent slow trials (long RTs). C) Choice probability for the CBGT network model. The reward for left and right actions changed every 10 trials, marked by vertical dashed lines. The horizontal dashed line represents chance performance.

62 Critically, the direct and indirect pathways converge in the  
 63 GPi/SNr (35, 36). This suggests that these pathways compete  
 64 to control whether each specific action is selected (37). The ap-  
 65 parent winner-take-all selection policy and action-channel like  
 66 coding (27–31) also imply that action representations them-  
 67 selves compete. Altogether, this neuroanatomical evidence  
 68 suggests that competition both between and within CBGT  
 69 pathways controls the rate of evidence accumulation during  
 70 decision making (12, 15, 19).

71 To illustrate this process, we designed a spiking neural  
 72 network model of the CBGT circuits, shown in Fig. 1A, with

dopamine-dependent plasticity occurring at the corticostriatal  
 synapses (17, 38). The network performed a probabilistic  
 2-arm bandit task with switching reward contingencies ((7);  
 see Materials and Methods). The experimental task followed  
 the same general structure as our prior work (7). In brief, the  
 network selected one of two targets, each of which returned a  
 reward according to a specific probability distribution. The  
 relative reward probabilities for each target were held constant  
 at 75% and 25% and the action-outcome contingency was  
 changed every 10 trials, on average. For the purpose of this  
 study we focus primarily on the neural and behavioral effects

84 that occur around the switching of the optimal target. We used  
85 four different network instances (see [Materials and Methods](#))  
86 as a proxy for simulating individual differences over human  
87 participants.

88 Figure 1B shows the firing rates of dSPNs and iSPNs in  
89 the left action channel, time-locked to selection onset (when  
90 thalamic units exceed 30Hz,  $t=0$ ), for both fast ( $< 196$ ms)  
91 and slow ( $> 314.5$ ms) decisions. As expected, the dSPNs show  
92 a ramping of activity as decision onset is approached and the  
93 slope of this ramp scales with response speed. In contrast, we  
94 see that iSPN firing is sustained during slow movements and  
95 weakly ramps during fast movements. However, iSPN firing  
96 was relatively insensitive to left versus right decisions. This  
97 is consistent with our previous work showing that differences  
98 in direct pathways track primarily with choice while indirect  
99 pathway activity modulates overall response speeds ([12](#), [19](#))  
100 as supported by experimental studies ([39–41](#)).

101 We then modeled the behavior of the CBGT network using a  
102 hierarchical version of the DDM ([42](#)), a canonical formalism for  
103 the process of evidence accumulation during decision-making  
104 ([2](#)) (Fig. 2A). This model returns four key parameters with  
105 distinct influences on evidence accumulation. The drift rate  
106 ( $v$ ) represents the rate of evidence accumulation, the boundary  
107 height ( $a$ ) represents the amount of evidence required to cross  
108 the decision threshold, nondecision time ( $t$ ) is the delay in  
109 the onset of the accumulation process, and starting bias ( $z$ )  
110 is a bias to begin accumulating evidence for one choice over  
111 another (see [Methods](#) section).

112 We tracked internal estimates of action-value and envi-  
113 ronmental change using trial-by-trial estimates of two ideal  
114 observer parameters, the belief in the value of the optimal  
115 choice ( $\Delta B$ ) and change point probability ( $\Omega$ ), respectively  
116 (see [3](#), [7](#)) and [Methods](#) for details). Using these estimates,  
117 we evaluated how a suspected change in the environment  
118 and the belief in optimal choice value influenced underly-  
119 ing decision parameters. Consistent with prior observations  
120 in humans ([7](#)) we found that both  $v$  and  $a$  were the most  
121 pliable parameters across experimental conditions for the net-  
122 work. Specifically, we found that the model mapping  $\Delta B$   
123 to drift rate and  $\Omega$  to boundary height and the model map-  
124 ping  $\Delta B$  to drift rate provided equivocal best fits to the data  
125 over human participants ( $\Delta DIC_{\text{null}} = -29.85 \pm 12.76$  and  
126  $\Delta DIC_{\text{null}} = -22.60 \pm 7.28$ , respectively; see [43](#)) and [Methods](#)  
127 for guidelines on model fit interpretation). All other models  
128 failed to provide a better fit than the null model (Supp. [Table](#)  
129 [S2](#)). Consistent with prior work ([7](#)), we found that the  
130 relationship between  $\Omega$  and the boundary height was unreli-  
131 able (mean  $\beta_{a \sim \Omega} = 0.069 \pm 0.152$ ; mean  $p = 0.232 \pm 0.366$ ).  
132 However, drift rate reliably increased with  $\Delta B$  in three of four  
133 participants (mean  $\beta_{v \sim \Delta B} = 0.934 \pm 0.386$ ; mean  $p < 0.001$ ;  
134 4/4 participants  $p < 0.001$ ; Supp. [Table](#) [S2](#)).

135 These effects reflect a stereotyped trajectory around a  
136 change point, whereby  $v$  immediately plummets and  $a$  briefly  
137 increases, with  $a$  quickly recovering and  $v$  slowly growing as re-  
138 ward feedback reinforces the new optimal target ([7](#)). Because  
139 prior work has shown that the change in  $v$  is more reliable  
140 than changes in  $a$  ([7](#)) and because  $v$  determines the direction  
141 of choice, we focus the remainder of our analysis on the control  
142 of  $v$ .

143 To test whether these shifts in  $v$  are driven by competition  
144 within and between action channels, we predicted the network's

145 decision on each trial using a LASSO-PCR classifier trained  
146 on the pre-decision firing rates of the network (see [Measuring](#)  
147 [neural action representations](#)). The cross-validated accuracy  
148 for the four simulated participants is shown in [Figure 2B](#).  
149 This model was able to predict the chosen action with  $\approx 70\%$   
150 accuracy (72-77%) for each simulated participant, with an  
151 overall accuracy of  $\approx 74\%$ . Examining the encoding pattern in  
152 the simulated network, we see lateralized activation over left  
153 and right action channels (Fig. 1A), with opposing weights  
154 in GPi and thalamus, and, to a lesser degree, contralateral  
155 encoding in STN and in both indirect and direct SPNs in  
156 striatum. We do not observe contralateral encoding in cortex,  
157 which likely reflects the emphasis on basal ganglia structures  
158 and lumped representation of cortex in the model design.

159 To quantify the competition between action channels, we  
160 took the unthresholded prediction from the LASSO-PCR classi-  
161 fier,  $\hat{y}_t$ , and calculated its distance from the optimal target (i.e.,  
162 target with the highest reward probability) on each trial (Supp.  
163 Fig. [S3](#); Fig. [2C](#)). This provided an estimate of the classifier's  
164 uncertainty driven by the separability of pre-decision activity  
165 across action channels. In other words, the distance from the  
166 optimal target should increase with increased co-activation of  
167 circuits that represent opposing actions. If the competition  
168 in action channels is also driving  $v$ , then there should be a  
169 negative correlation between the classifier's uncertainty and  
170  $v$ , particularly around a change point. Indeed, this is exactly  
171 what we see (Fig. 2D). In fact, the classifier's uncertainty and  $v$   
172 are consistently negatively correlated across all trials in every  
173 simulated participant and in aggregate (Fig. 2E). Thus, in our  
174 model of the CBGT pathways, competition between action rep-  
175 resentations drives changes in  $v$  in response to environmental  
176 change.

### 177 ***Homo sapiens* adapt decision policies in response to change.**

178 To test the predictions of our model, a sample of primates  
179 (*Homo sapiens*,  $n=4$ ) played a dynamic two-armed bandit task  
180 under experimental conditions similar to those used for the  
181 simulated CBGT network and prior behavioral work ([7](#)) as  
182 whole brain hemophysiological signals were recorded using  
183 functional magnetic resonance imaging (fMRI). On each trial,  
184 participants were presented with a male and female Greeble  
185 ([44](#)). The goal was to select the Greeble most likely to give  
186 a reward. Selections were made by pressing a button with  
187 their left or right hand to indicate the left or right Greeble  
188 on the screen. We collected 2700 trials over 45 runs from nine  
189 separate imaging sessions per participant. Consistent with  
190 our within-participant design, statistical analyses estimated  
191 effects on a single-participant basis.

192 Overall, speed and accuracy across conditions matched  
193 what we observed in previous experiments (Experiment 2 in  
194 [7](#)). Specifically, we see a consistent effect of change point  
195 on both RT and accuracy that matches the behavior of our  
196 network (Supp. Fig. [S2](#); Supp. [Table](#) [S1](#)).

197 To address how a change in the environment shifted underly-  
198 ing decision dynamics, we used a hierarchical DDM modeling  
199 approach ([42](#)) as we did with the network behavior (see [Meth-](#)  
200 [ods](#) for details). Given previous empirical work ([7](#)) and the  
201 results from our CBGT network model showing that only  $v$   
202 and, less reliably,  $a$  respond to a shift in the environment ([7](#)),  
203 we focused our subsequent analysis on these two parameters.  
204 Consistent with the predictions from our CBGT model, we  
205 found equivocal fits for the model mapping both  $\Delta B$  to  $v$  and

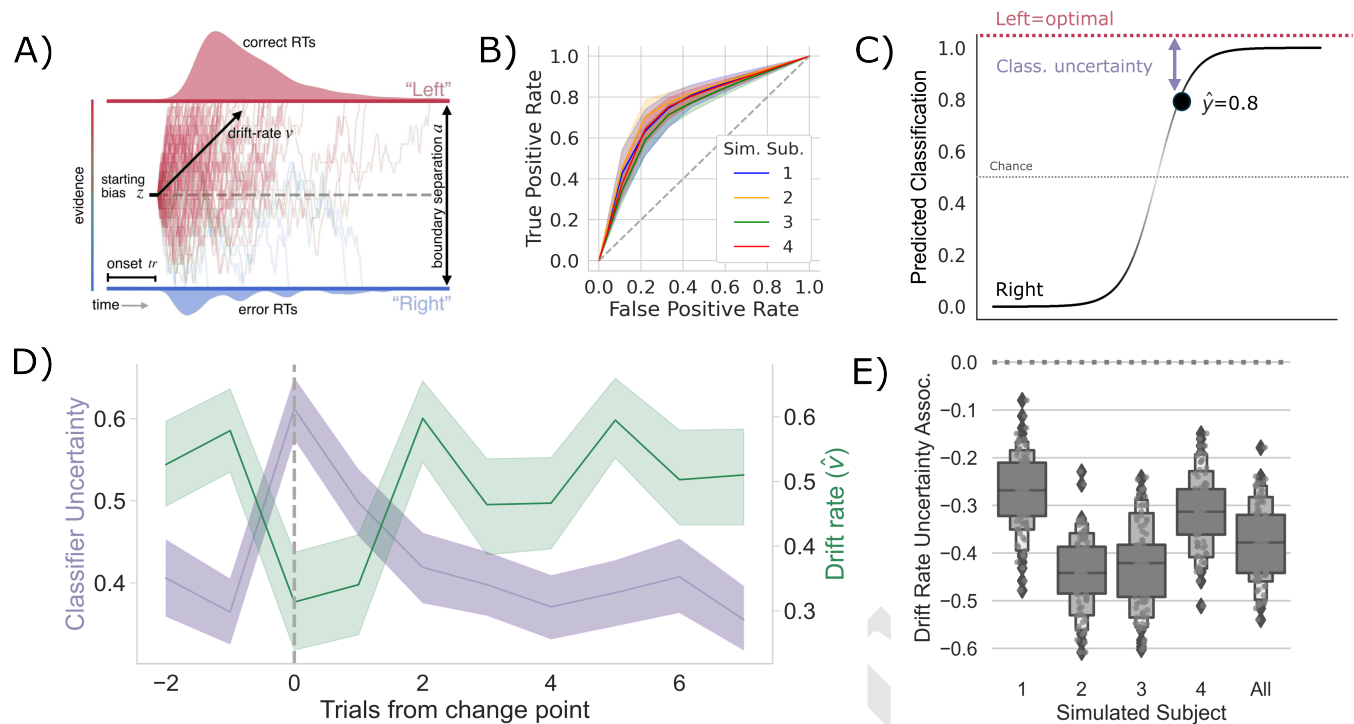

**Fig. 2. Competition between action plans should drive evidence accumulation.** A) Decision parameters were estimated by modeling the joint distribution of reaction times and responses within a drift diffusion framework. B) Classification performance for single-trial left and right actions shown as an ROC curve. The gray dashed line represents chance performance. C) Predicted left and right responses. The distance of the predicted response from the optimal choice represents classifier uncertainty for each trial. For example, here the predicted probability of a left response on the first trial  $\hat{y}_{t_1}$  is 0.8. The distance from the optimal choice on this trial and, thereby, the classifier uncertainty  $u_{t_1}$ , is 0.2. D) Change-point-evoked classifier uncertainty (lavender) and drift rate (green). The change point is marked by a dashed line. E) The association between classifier uncertainty and drift rate. Results for individual participants are presented along with aggregated results.

206  $\Omega$  to  $a$  and a simpler model mapping  $\Delta B$  to  $v$  (see Supp. Table S2 for average results). This pattern was fairly consistent at the participant level, with 3/4 participants showing  $\Delta B$  modulating  $v$  (Supp. Table S3). These results suggest that as the belief in the value of the optimal choice approaches the reward value for the optimal choice, the rate of evidence accumulation increases.

213 Taken altogether, we confirm that humans rapidly shift how quickly they accumulate evidence (and, to some degree, how much evidence they need to make a decision) in response to a change in action-outcome contingencies. This mirrors the decision parameter dynamics predicted by the CBGT model. We next evaluated how this change in decision policy tracks with competition in neural action representations.

220 **Measuring action representations in the brain.** To measure competition in action representations, we first needed to determine how individual regions (i.e., voxels) contribute to single decisions. For each participant, trial-wise responses at every voxel were estimated by means of a general linear model (GLM), with trial modeled as a separate condition in the design matrix. Therefore, the  $\hat{\beta}_{t,v}$  estimated at voxel  $v$  reflected the magnitude of the evoked response on trial  $t$ . As in the CBGT model analysis, these whole-brain, single-trial responses were then submitted to a LASSO-PCR classifier to predict left/right response choices. The performance of the classifier for each participant was evaluated with a 45-fold cross-validation, iterating through all runs so that each one corresponded to the hold-out test set for one fold.

234 Our classifier was able to predict single trial responses well above chance for each of the four participants (Fig. 3A and B), with mean prediction accuracy ranging from 65% to 83% (AUCs from 0.72 to 0.92). Thus, as with the CBGT network model, we were able to reliably predict trial-wise responses for each participant. Fig. 3C shows the average encoding map for our model as an illustration of the influence of each voxel on our model predictions (Fig. S4 displays individual participant maps). These maps effectively show voxel-tuning towards rightward (blue) or leftward (red) responses. Qualitatively, we see that cortex, striatum, and thalamus all exhibit strongly lateralized influences on contralateral response prediction. Indeed, when we average the encoding weights in terms of principal CBGT nuclei (Fig. 3D), we confirm that these three regions largely predict contralateral responses. Fig. S5 provides a more detailed summary of the encoding weights across multiple cortical and subcortical regions.

251 These results show that we can reliably predict single-trial choices from whole-brain hemodynamic responses for individual participants. Further, key regions of the CBGT pathway contribute to these predictions. Next, we set out to determine whether competition between these representations for left and right actions correlates with changes in the drift rate, as predicted by the CBGT network model (Fig. 2C).

258 **Competition between action representations may drive drift-rate.** To evaluate whether competition between action channels correlates with the magnitude of  $v$  on each trial, as the CBGT network predicts (Fig. 2C), we focused our



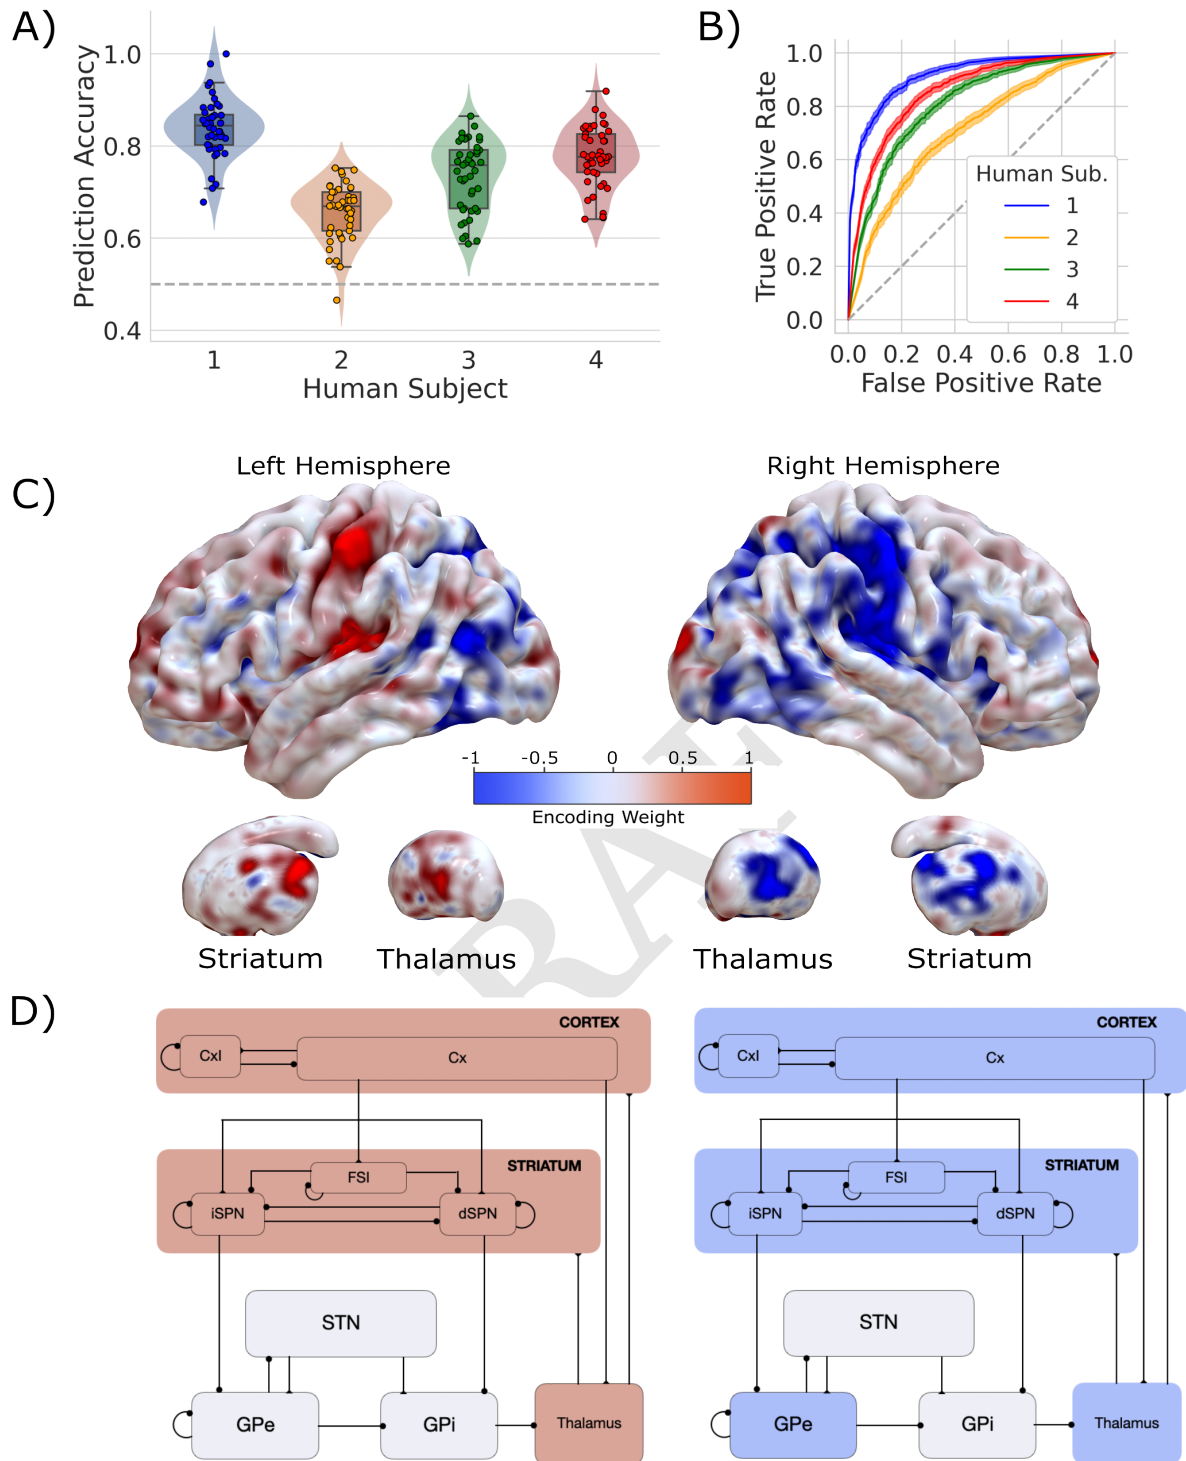

**Fig. 3. Single-trial prediction of action plan competition in humans.** A) Overall classification accuracy for single-trial actions for each participant. Each point corresponds to the performance for each cross-validation fold. B) Classification performance for single-trial actions shown as an ROC curve. The gray dashed line represents chance performance. C) Participant-averaged encoding weight maps in standard space for both hemispheres. D) The mean encoding weights within each CBGT node in both hemispheres. See encoding weight scale above for reference.

262 analysis on trials surrounding the change point, following  
 263 analytical methods identical to those described in the pre-  
 264 vious section and shown in Fig. 2C. Consistent with the  
 265 CBGT network model predictions, following a change point,

*v* shows a stereotyped drop and recovery as observed in the  
 CBGT network (Fig. 2C) and prior behavioral work (7) (Fig.  
 4A). This drop in *v* tracked with a relative increase in clas-  
 sifier uncertainty, and subsequent recovery, in response to a

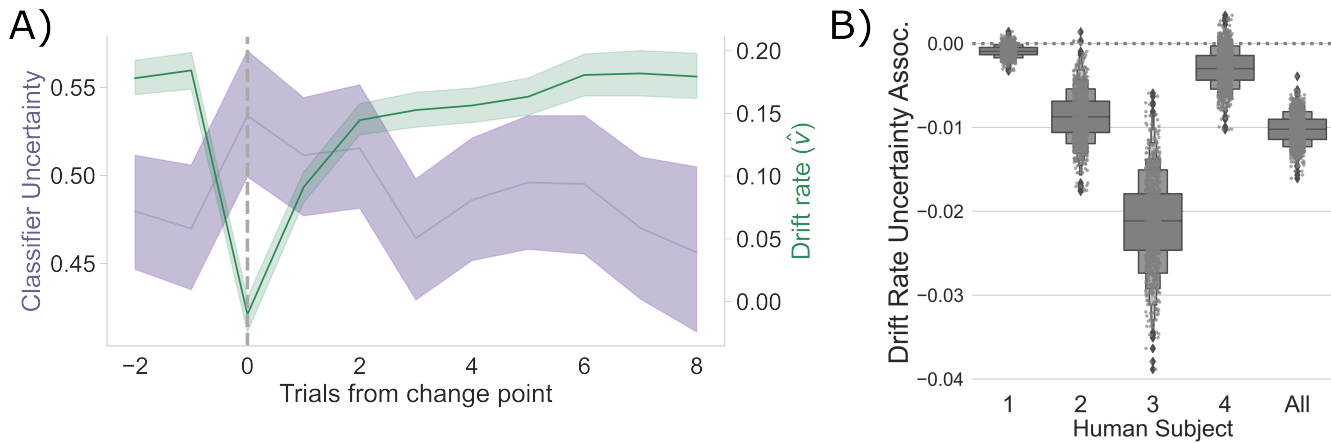

**Fig. 4. Competition between action plans drives evidence accumulation in humans.** A) Classifier uncertainty (lavender) and estimated drift rate ( $\hat{v}$ ; green) dynamics. B) The association between classifier uncertainty and drift rate by participant and in aggregate.

change in action-outcome contingencies (mean bootstrapped  $\beta$ :  $-0.021$  to  $-0.001$ ;  $t$  range:  $-3.996$  to  $-1.326$ ;  $p_{S1} = 0.057$ ,  $p_{S2} < 0.001$ ;  $p_{S3} < 0.001$ ;  $p_{S3} = 0.080$ ,  $p_{All} < 0.001$ ). As with the CBGT network simulations (Fig. 2D), we also observe a consistent negative correlation between  $v$  and classifier uncertainty over all trials, irrespective of their position to a change point, in each participant and in aggregate (Fig. 4B; Spearman's  $\rho$  range:  $-0.08$  to  $-0.04$ ;  $p$  range:  $< 0.001$  to  $0.043$ ).

These results clearly suggest that, as predicted by our CBGT network simulations and prior work (12, 17, 45), competition between action representations drives changes in the rate of evidence accumulation during decision making in humans.

## Discussion

We investigated the underlying mechanisms that drive shifts in decision policies when the rules of the environment change. We first tested an implementation-level theory of how CBGT networks contribute to changes in decision policy parameters. This theory predicted that the rate of evidence accumulation is driven by competition across action representations. Using a high-powered within-participants fMRI design conducted with four human primates, wherein each participant served as an independent replication test, we found evidence consistent with our CBGT network simulations. Specifically, as action-outcome contingencies change, decision policies shift with a rapid decrease in the rate of evidence accumulation, followed by a gradual recovery to baseline rates as new contingencies are learned (see also (7)). These results empirically validate prior theoretical and computational work predicting that competition between neural populations encoding distinct actions modulates how information is used to drive a decision (9, 12, 14, 20, 21).

Our findings here align with prior work on the role of competition in the regulation of evidence accumulation. In the decision-making context, the ratio of dSPN to iSPN activation within an action channel has been linked to the drift-rate of single-action decisions (14–16, 37). In the motor control context, this competition manifests as movement vigor (46–48).

Yet, our results show how competition across channels drives drift-rate dynamics. So how do we reconcile these two effects? Mechanistically, the strength of each action channel is defined by the relative difference between dSPN and iSPN influence. In this way, competition across action channels is defined by the relative balance of direct and indirect pathway activation within each channel. Greater direct vs. indirect pathway competition in one action channel, relative to another, makes that action decision relatively slow and reduces the overall likelihood that it is selected. This mechanism is consistent with prior theoretical (12, 45) and empirical work (18).

While our current work postulates a mechanism by which changes in action-outcome contingencies drive changes in evidence accumulation through plasticity within the CBGT circuits, the results presented here are far from conclusive. For example, our model of the underlying neural dynamics predicts that the certainty of individual action representations is encoded by the competition between direct and indirect pathways (see also (12, 38, 45)). Thus, external perturbation of dSPN (or iSPN) firing, say with optogenetic methods, during decision-making should causally impact the evidence accumulation rate and, subsequently, the speed (or slow) the speed at which the new action-outcome contingencies are learned. Indeed, there is already some evidence for this outcome (see (18), but also (49) for contrastive evidence). Our model, however, has very specific predictions with regards to disruptions of each pathway within an action representation. Disrupting the balance of dSPN and iSPN efficacy should selectively impact the drift-rate (and, to a degree, onset bias; see (45)), while non-specific disruption of global iSPN efficacy across action representations should selectively disrupt boundary height (and, to a degree, accumulation onset time; see again (45)). Based on the behavioral outcomes here, as well as previous studies (7)), Thus, increasing the difference between dSPN and iSPN firing in the channel representing the new optimal-action, say by selective excitation of the relevant dSPNs, should speed up the time to resolve the credit assignment problem during learning. This would result in faster and more accurate learning following an environmental change and lead to characteristic signatures in the distribution of reaction times, as well as choice probabilities, reflective of a shift in evidence

350 accumulation rate. Of course, testing these predictions is left  
351 to future work.

## 352 Conclusion

353 As the world changes and certain actions become less optimal,  
354 successful behavioral adaptation requires flexibly changing  
355 how sensory evidence drives decisions. Our simulations and  
356 hemophysiological experiments in human primates show how  
357 this process can occur within the CBGT circuits. Here, a shift  
358 in action-outcome contingencies induces competition between  
359 encoded action plans by modifying the relative balance of  
360 direct and indirect pathway activity in CBGT circuits, both  
361 within and between action channels, slowing the rate of evi-  
362 dence accumulation to promote adaptive exploration. If the  
363 environment subsequently remains stable, then this learning  
364 process accelerates the rate of evidence accumulation for the  
365 optimal decision by increasing the strength of action repre-  
366 sentations for the new optimal choice. This highlights how  
367 these macroscopic systems promote flexible, effective decision-  
368 making under dynamic environmental conditions.

## 369 Materials and Methods

370 **Simulations.** We simulated neural dynamics and behavior using a  
371 biologically based, spiking cortico-basal ganglia-thalamic (CBGT)  
372 network model (11, 19). The network representing the CBGT circuit  
373 is composed of 9 neural populations: cortical interneurons (CxI),  
374 excitatory cortical neurons (Cx), striatal D1/D2-spiny projection  
375 neurons (dSPNs/iSPNs), striatal fast-spiking interneurons (FSI),  
376 the internal (GPi) and external globus pallidus (GPe), the subtha-  
377 lamic nucleus (STN), and the thalamus (Th). All the neuronal  
378 populations are segregated into two action channels with the excep-  
379 tion of cortical (CxI) and striatal interneurons (FSIs). Each neuron  
380 in the population was modeled with an integrate-fire-or-burst-model  
381 (50), and a conductance-based synapse model was used for NMDA,  
382 AMPA and GABA receptors. The neuronal and network param-  
383 eters (inter-nuclei connectivity and synaptic strengths) were tuned  
384 to obtain realistic baseline firing rates for all the nuclei. The details  
385 of the model are described in our previous work (19) as well as in  
386 the appendix for the sake of completeness.

387 Corticostriatal weights for D1 and D2 neurons in striatum were  
388 modulated by phasic dopamine to model the influence of reinforce-  
389 ment learning on network dynamics. The details of STDP learning  
390 are described in detail in previous work (38), but key details are  
391 shown below. As a result of these features of the CBGT network, it  
392 was capable of learning under realistic experimental paradigms with  
393 probabilistic reinforcement schemes (i.e. under reward probabilities  
394 and unstable action-outcome values).

396 **Threshold for CBGT network decisions.** A decision between the two  
397 competing actions (“left” and “right”) was considered to be made  
398 when either of the thalamic subpopulations reached a threshold  
399 of 30Hz. This threshold was set based on the network dynamics  
400 for the chosen parameters with a aim to obtain realistic reaction  
401 times. The maximum time allowed to reach a decision was 1000ms.  
402 If none of the thalamic subpopulations reach the threshold of 30Hz,  
403 no action was considered to be taken. Such trials were dropped  
404 from further analysis. Reaction/decision times were calculated as  
405 time from stimulus onset to decision (either subpopulation reaches  
406 the threshold). The “slow” and “fast” trials were categorized as  
407 reaction times  $\geq$  75th percentile (314.5ms) and reactions time  $<$  50th  
408 percentile (196.0ms), respectively, of the reaction time distributions.  
409 The firing rates of the CBGT nuclei during the reaction times were  
410 used for prediction analysis as discussed in Section 1.

411 **Corticostriatal weight plasticity.** The corticostriatal weights are modi-  
412 fied by a dopamine-mediated STDP rule, where the phasic dopamine  
413 is modulated by reward prediction error. The internal estimate of  
414 the reward is calculated at every trial by a Q-learning algorithm

415 which is subtracted from the reward associated with the experi-  
416 mental paradigm to yield a trial-by-trial estimate of the reward  
417 prediction error. The effect of dopaminergic release is receptor  
418 dependent; a rise in dopamine promotes potentiation for D1-SPNs  
419 and depression for D2-SPNs. The degree of change in the weights  
420 is dependent on an eligibility trace which is proportional to the co-  
421 incidental pre-synaptic (cortical) and post-synaptic (striatal) firing  
422 rates. The STDP rule is described in detail in (38) as well as in the  
423 appendix.

424 **In silico experimental design.** We follow the paradigm of a 2 arm  
425 bandit task, where the CBGT network learns to consistently choose  
426 the rewarded action until the block changes (i.e the reward contin-  
427 gencies switch), at which point the CBGT network re-learns the  
428 rewarded action (reversal learning). Each session consists of 40  
429 trials with a block change every 10 trials. The reward probabilities  
430 represent a conflict of (75%, 25%); that is, in a left block, 75% of  
431 the left actions are rewarded, whereas 25% of the right actions are  
432 rewarded. The inter-trial-interval in network time is fixed to 600ms.

433 To maximize the similarity between the CBGT network simu-  
434 lations and our human data, we randomly varied the initialization  
435 of the network such that neurons with a specific connection proba-  
436 bility were randomly chosen for each simulated subject, with the  
437 background input to the nuclei for each simulated subject as a  
438 mean-reverting random walk (noise was drawn from the normal  
439 distribution  $N(0,1)$ ). These means are listed in Supp. Table 1.

440 **Participants.** Four neurologically healthy adult human primates (two  
441 female, all right-handed, 29-34 years old) were recruited and paid  
442 \$30 per session, in addition to a performance bonus and a bonus  
443 for completing all nine sessions. These participants were recruited  
444 from the local university population.

445 All procedures were approved by the Carnegie Mellon University  
446 Institutional Review Board. All research participants provided  
447 informed consent to participate in the study and consent to publish  
448 any research findings based on their provided data.

449 **Experimental design.** The experiment used male and female Gree-  
450 bles (44) as selection targets. Participants were first trained to  
451 discriminate between male and female Greebles to prevent errors in  
452 perceptual discrimination from interfering with selection on the ba-  
453 sis of value. Using a two-alternative forced choice task, participants  
454 were presented with a male and female Greeble and asked to select  
455 the female, with the male and female Greeble identities resampled  
456 on each trial. Participants received binary feedback regarding their  
457 selection (correct or incorrect). This criterion task ended after  
458 participants reached 95% accuracy. After reaching perceptual dis-  
459 crimination criterion for each session, each participant was tested  
460 under nine reinforcement learning conditions composed of 300 trials  
461 each, generating 2700 trials per participant in total. Data were col-  
462 lected from four participants in accordance with a replication-based  
463 design, with each participant serving as a replication experiment.  
464 Participants completed these sessions in randomized order. Each  
465 learning trial presented a male and female Greeble (44), with the  
466 goal of selecting the gender identity of the Greeble that was most  
467 rewarding. Because individual Greeble identities were resampled  
468 on each trial, the task of the participant was to choose the gender  
469 identity rather than the individual identity of the Greeble which  
470 was most rewarding.

471 Probabilistic reward feedback was given in the form of points  
472 drawn from the normal distribution  $\mathcal{N}(\mu = 3, \sigma = 1)$  and converted  
473 to an integer. These points were displayed at the center of the screen.  
474 For each run, participants began with 60 points and lost one point for  
475 each incorrect decision. To promote incentive compatibility (51, 52),  
476 participants earned a cent for every point earned. Reaction time was  
477 constrained such that participants were required to respond within  
478 between 0.1 s and 0.75 s from stimulus presentation. If participants  
479 responded in  $\leq 0.1$  s,  $\geq 0.75$  s, or failed to respond altogether,  
480 the point total turned red and decreased by 5 points. Each trial  
481 lasted 1.5 s and reward feedback for a given trial was displayed from  
482 the time of the participant’s response to the end of the trial. To  
483 manipulate change point probability, the gender identity of the most  
484 rewarding Greeble was switched probabilistically, with a change  
485 occurring every 10, 20, or 30 trials, on average. To manipulate the  
486 belief in the value of the optimal target, the probability of reward



487 for the optimal target was manipulated, with  $P$  set to 0.65, 0.75, 549  
488 or 0.85. Each session combined one value of  $P$  with one level of 550  
489 volatility, such that all combinations of change point frequency and 551  
490 reward probability were imposed across the nine sessions. Finally, 552  
491 the position of the high-value target was pseudo-randomized on 553  
492 each trial to prevent prepotent response selections on the basis of  
493 location.

494 **Behavioral analysis.** Statistical analyses and data visualization were 554  
495 conducted using custom scripts written in R (R Foundation for 555  
496 Statistical Computing, version 3.4.3) and Python (Python Software 556  
497 Foundation, version 3.5.5). Binary accuracy data were submitted 557  
498 to a mixed effects logistic regression analysis with either the degree 558  
499 of conflict (the probability of reward for the optimal target) or the 559  
500 degree of volatility (mean change point frequency) as predictors. 560  
501 The resulting log-likelihood estimates were transformed to likelihood 561  
502 for interpretability. RT data were log-transformed and submitted to 562  
503 a mixed effects linear regression analysis with the same predictors 563  
504 as in the previous analysis. To determine if participants used ideal 564  
505 observer estimates to update their behavior, two more mixed effects 565  
506 regression analyses were performed. Estimates of change point 566  
507 probability and the belief in the value of the optimal target served 567  
508 as predictors of reaction time and accuracy across groups. As before, 568  
509 we used a mixed logistic regression for accuracy data and a mixed 569  
510 linear regression for reaction time data.

511 **Estimating evidence accumulation using drift diffusion modeling.** To 570  
512 assess whether and how much the ideal observer estimates of change 571  
513 point probability ( $\Omega$ ) and the belief in the value of the optimal 572  
514 target ( $\Delta B$ ) (3, 7) updated the rate of evidence accumulation ( $v$ ), we 573  
515 regressed the change-point-evoked ideal observer estimates onto the 574  
516 decision parameters using hierarchical drift diffusion model (HDDM) 575  
517 regression (53). These ideal observer estimates of environmental 576  
518 uncertainty served as a more direct and continuous measure of the 577  
519 uncertainty we sought to induce with our experimental manipulations. 578  
520 Using this more direct approach, we pooled change point 579  
521 probability and belief across all conditions and used these values as 580  
522 our predictors of drift rate and boundary height. Responses were 581  
523 accuracy-coded, and the belief in the difference between targets 582  
524 values was transformed to the belief in the value of the optimal 583  
525 target ( $\Delta B_{\text{optimal}(t)} = B_{\text{optimal}(t)} - B_{\text{suboptimal}(t)}$ ). This approach 584  
526 allowed us to estimate trial-by-trial covariation between the ideal 585  
527 observer estimates and the decision parameters.

To find the models that best fit the observed data, we conducted 586  
a model selection process using Deviance Information Criterion 587  
(DIC) scores. A lower DIC score indicates a model that loses less 588  
information. Here, a difference of two points from the lowest- 589  
scoring model cannot rule out the higher scoring model; a difference 590  
of three to seven points suggests that the higher scoring model has 591  
considerably less support; and a difference of 10 points suggests 592  
essentially no support for the higher scoring model (43, 54). We 593  
evaluated the DIC scores for the set of fitted models relative to an 594  
intercept-only regression model ( $DIC_{\text{intercept}} - DIC_{\text{model}_i}$ ).

528 **MRI Data Acquisition.** Neurologically healthy human participants 594  
529 ( $N=4$ , 2 female) were recruited. Each participant was tested in 595  
530 nine separate imaging sessions using a 3T Siemens Prisma scanner. 596  
531 Session 1 included a set of anatomical and functional localizer 597  
532 sequences (e.g., visual presentation of Greeble stimuli with no manual 598  
533 responses, and left vs. right button responses to identify motor net- 599  
534 works). Sessions 2-10 collected five functional runs of the dynamic 600  
535 2-armed bandit task (60 trials per run). Male and female "greebles" 601  
536 served as the visual stimuli for the selection targets (44), with each 602  
537 presented on one side of a central fixation cross. Participants were 603  
538 trained to respond within 1.5 seconds.

To minimize the convolution of the hemodynamic response from 604  
trial to trial, inter-trial intervals were sampled according to a trun- 605  
cated exponential distribution with a minimum of 4 s between trials, 606  
a maximum of 16 s, and a rate parameter of 2.8 s. To ensure that 607  
head position was stabilized and stable over sessions, a CaseForge 608  
head case was customized and printed for each participant. The 609  
task-evoked hemodynamic response was measured using a high 610  
spatial ( $2\text{mm}^3$  voxels) and high temporal (750ms TR) resolution 611  
echo planar imaging approach. This design maximized recovery of 612  
single-trial evoked BOLD responses in subcortical areas, as well as

cortical areas with higher signal-to-noise ratios. During each func- 549  
tional run, eye-tracking (EyeLink, SR Research Inc.), physiological 550  
signals (ECG, respiration, and pulse-oximetry via the Siemens PMU 551  
system) were also collected for tracking attention and for artifact 552  
removal. 553

**Preprocessing.** fMRI data were preprocessed using the default 554  
pipeline of fMRIPrep (55), a standard toolbox for fMRI data pre- 555  
processing that provides stability to variations in scan acquisition 556  
protocols, a minimal user manipulation, and easily interpretable, 557  
comprehensive output results reporting. 558

**Single-trial response estimation.** By means of a univariate general 559  
linear model (GLM) within participant trial-wise responses at the 560  
voxel-level were estimated. Specifically, for each fMRI run prepro- 561  
cessed BOLD time series were regressed onto a design matrix, where 562  
each task trial corresponded to a different column, and was modeled 563  
using a boxcar function convolved with the default hemodynamic 564  
response function given in SPM12. Thus, each column in the design 565  
matrix estimated the average BOLD activity within each trial. In 566  
order to account for head motion, the six realignment parameters (3 567  
rotations, 3 translations) were included as covariates. In addition, a 568  
high-pass filter (128 s) was applied to remove low-frequency artifacts. 569  
Parameter and error variance were estimated using the RobustWLS 570  
toolbox, which adjusts for further artifacts in the data by inversely 571  
weighting each observation according to its spatial noise (56). 572

Finally, estimated trial-wise responses were concatenated across 573  
runs and sessions and then stacked across voxels to give a matrix, 574  
 $\hat{\beta}_{t,v}$ , of  $T$  (trial estimations)  $\times$   $V$  (voxels) for each participant. 575

**Single-trial response prediction.** A machine learning approach was 576  
applied to predict left/right greeble choices from the trial-wise 577  
responses. First, using the trial-wise hemodynamic responses, we 578  
estimated the contrast in neural activation when the participant 579  
made a left versus right selection. A Lasso-PCR classifier (i.e. an L1- 580  
constrained principal component logistic regression) was estimated 581  
for each participant according to the below procedure. First, a 582  
singular value decomposition (SVD) was applied to the input matrix 583  
 $X$ : 584

$$X = USV^T, \quad [1] \quad 585$$

where the product matrix  $Z = US$  represents the principal 586  
component scores, i.e. the projected values of  $X$  into the principal 587  
component space, and  $V^T$  an orthogonal matrix whose rows are 588  
the principal directions in feature space. Then the binary response 589  
variable  $y$  (Left/Right choice) was regressed onto  $Z$ , where the 590  
estimation of the  $\beta$  coefficients is participant to a L1 penalty term 591  
 $C$  in the objective function: 592

$$\hat{\beta} = \arg \min_{\beta} \frac{1}{2} \beta^T \beta + C \sum_{i=1}^N \log(\exp(-y_i(Z_i^T \beta)) + 1), \quad [2] \quad 593$$

where  $\beta$  and  $Z$  include the intercept term,  $y_i = \{-1, 1\}$  and  $N$  is the 594  
number of observations. Projection of the estimated  $\hat{\beta}$  coefficients 595  
back to the original feature (voxel) space was done to yield a weight 596  
map  $\hat{w} = V\hat{\beta}$ , which in turn was used to generate final predictions 597  
 $\hat{y}$ : 598

$$\hat{y} = \frac{1 - e^{-x \cdot \hat{w}}}{1 + e^{-x \cdot \hat{w}}}, \quad [3] \quad 599$$

where  $x$  denotes the vector of voxel-wise responses for a given trial 600  
(i.e. a given row in the  $X$  matrix). When visualizing the resulting 601  
weight maps, these were further transformed to encoded brain 602  
patterns. This step was performed to aid in correct interpretation in 603  
terms of the studied brain process, because doing this directly from 604  
the observed weights in multivariate classification (and regression) 605  
models can be problematic (57). 606

Here, the competition between left-right neural responses de- 607  
creases classifier decoding accuracy, as neural activation associated 608  
with these actions becomes less separable. Therefore, classifier 609  
prediction serves as a proxy for response competition. To quanti- 610  
fy uncertainty from this, we calculated the Euclidean distance of 611  
these decoded responses  $\hat{y}$  from the statistically optimal choice on a 612



613 given trial, *opt\_choice*. This yielded a trial-wise uncertainty metric  
614 derived from the decoded competition between neural responses.

$$615 \quad \hat{U} = d(\hat{y}, \text{opt\_choice}). \quad [4]$$

616 The same analytical pipeline was used to calculate single trial  
617 responses for simulated data with a difference that trial-wise average  
618 firing rates of all nuclei from the simulations were used instead of  
619 fMRI hemodynamic responses.

620 **Data sharing.** Behavioral data and computational derivatives are  
621 publically available [here](#). Raw and preprocessed hemodynamic  
622 data, in addition to physiological measurements collected for quality  
623 control, are available [here](#).

624 **ACKNOWLEDGMENTS.** We thank all members of the CoAx  
625 Lab and collaborators for their feedback on the development of this  
626 work.

- 627 1. JI Gold, MN Shadlen, The neural basis of decision making. *Annu. Rev. Neurosci.* **30**, 535–561
- 628 2. R Ratcliff, A theory of memory retrieval. *Psychol. review* **85**, 59 (1978).
- 629 3. MR Nassar, RC Wilson, B Healy, JI Gold, An approximately bayesian delta-rule model
- 630 explains the dynamics of belief updating in a changing environment. *J. Neurosci.* **30**, 12366–
- 631 12378 (2010).
- 632 4. RC Wilson, Y Niv, Inferring relevance in a changing world. *Front. human neuroscience* **5**, 189
- 633 (2012).
- 634 5. MR Nassar, et al., Rational regulation of learning dynamics by pupil-linked arousal systems.
- 635 *Nat. neuroscience* **15**, 1040 (2012).
- 636 6. TE Behrens, MW Woolrich, ME Walton, MF Rushworth, Learning the value of information in
- 637 an uncertain world. *Nat. neuroscience* **10**, 1214 (2007).
- 638 7. K Bond, K Dunovan, A Porter, JE Rubin, T Verstynen, Dynamic decision policy reconfiguration
- 639 under outcome uncertainty. *Elife* **10**, e65540 (2021).
- 640 8. AE Urai, JW De Gee, TH Donner, Choice history biases subsequent evidence accumulation.
- 641 *BioRxiv* p. 251595 (2018).
- 642 9. R Ratcliff, MJ Frank, Reinforcement-based decision making in corticostriatal circuits: mutual
- 643 constraints by neurocomputational and diffusion models. *Neural computation* **24**, 1186–1229
- 644 (2012).
- 645 10. ML Pedersen, MJ Frank, G Biele, The drift diffusion model as the choice rule in reinforcement
- 646 learning. *Psychon. bulletin & review* **24**, 1234–1251 (2017).
- 647 11. K Dunovan, T Verstynen, Errors in action timing and inhibition facilitate learning by tuning
- 648 distinct mechanisms in the underlying decision process. *J. Neurosci.* **39**, 2251–2264 (2019).
- 649 12. K Dunovan, C Vich, M Clapp, T Verstynen, J Rubin, Reward-driven changes in striatal pathway
- 650 competition shape evidence evaluation in decision-making. *PLoS computational biology* **15**,
- 651 e1006998 (2019).
- 652 13. AG Mendonça, et al., The impact of learning on perceptual decisions and its implication for
- 653 speed-accuracy tradeoffs. *Nat. Commun.* **11**, 1–15 (2020).
- 654 14. K Dunovan, T Verstynen, Believer-skeptic meets actor-critic: Rethinking the role of basal
- 655 ganglia pathways during decision-making and reinforcement learning. *Front. neuroscience* **10**,
- 656 106 (2016).
- 657 15. S Bariselli, W Fobbs, M Creed, A Kravitz, A competitive model for striatal action selection.
- 658 *Brain research* (2018).
- 659 16. JG Mikhael, R Bogacz, Learning reward uncertainty in the basal ganglia. *PLoS Comput. Biol.*
- 660 **12**, e1005062 (2016).
- 661 17. JE Rubin, C Vich, M Clapp, K Noneman, T Verstynen, The credit assignment problem in
- 662 cortico-basal ganglia-thalamic networks: A review, a problem and a possible solution. *Eur. J.*
- 663 *Neurosci.* (2020).
- 664 18. MM Yartsev, TD Hanks, AM Yoon, CD Brody, Causal contribution and dynamical encoding in
- 665 the striatum during evidence accumulation. *Elife* **7**, e34929 (2018).
- 666 19. C Vich, M Clapp, T Verstynen, JE Rubin, Identifying control ensembles for information pro-
- 667 cessing within the cortico-basal ganglia-thalamic circuit. *bioRxiv* (2022).
- 668 20. R Bogacz, K Gurney, The basal ganglia and cortex implement optimal decision making
- 669 between alternative actions. *Neural computation* **19**, 442–477 (2007).
- 670 21. R Bogacz, EJ Wagenmakers, BU Forstmann, S Nieuwenhuis, The neural basis of the speed–
- 671 accuracy tradeoff. *Trends neurosciences* **33**, 10–16 (2010).
- 672 22. A Gupta, et al., Neural substrates of the drift-diffusion model in brain disorders. *Front. Comput.*
- 673 *Neurosci.* **15** (2021).
- 674 23. RL Albin, AB Young, JB Penney, The functional anatomy of disorders of the basal ganglia.
- 675 *Trends Neurosci.* **18**, 63–64 (1995).
- 676 24. DM Friend, AV Kravitz, Working together: basal ganglia pathways in action selection. *Trends*
- 677 *neurosciences* **37**, 301–3 (2014).
- 678 25. JW Mink, The basal ganglia: Focused selection and inhibition of competing motor programs.
- 679 *Prog. Neurobiol.* **50**, 381–425 (1996).
- 680 26. GE Alexander, MR DeLong, PL Strick, Parallel organization of functionally segregated circuits
- 681 linking basal ganglia and cortex. *Annu. review neuroscience* **9**, 357–381 (1986).
- 682 27. A Adler, I Finkes, S Katabi, Y Prut, H Bergman, Encoding by synchronization in the primate
- 683 striatum. *The J. neuroscience : official journal Soc. for Neurosci.* **33**, 4854–66 (2013).
- 684 28. A Klaus, et al., The spatiotemporal organization of the striatum encodes action space. *Submit-*
- 685 *ted* **95**, 1171–1180.e7 (2017).
- 686 29. G Barbera, et al., Spatially Compact Neural Clusters in the Dorsal Striatum Encode Locomotion
- 687 Relevant Information. *Neuron* **92**, 202–213 (2016).

- 688 30. L Carrillo-Reid, S Hernandez-Lopez, D Tapia, E Galarraga, J Bargas, Dopaminergic Modulation
- 689 of the Striatal Microcircuit: Receptor-Specific Configuration of Cell Assemblies. *J. Neurosci.*
- 690 **31**, 14972–14983 (2011).
- 691 31. N Badreddine, et al., Spatiotemporal reorganization of corticostriatal networks encodes motor
- 692 skill learning. *Cell Reports* **39** (2022).
- 693 32. AV Kravitz, LD Tye, AC Kreitzer, Distinct roles for direct and indirect pathway striatal neurons
- 694 in reinforcement. *Nat. Neurosci.* **15**, 816–818 (2012).
- 695 33. K Gurney, TJ Prescott, P Redgrave, A computational model of action selection in the basal
- 696 ganglia. II. Analysis and simulation of behaviour. *Biol. cybernetics* **84**, 411–23 (2001).
- 697 34. JW Mink, The basal ganglia: focused selection and inhibition of competing motor programs.
- 698 *Prog. neurobiology* **50**, 381–425 (1996).
- 699 35. H Kitano, I Tanibuchi, K Jinnai, The distribution of neurons in the substantia nigra pars reticulata
- 700 with input from the motor, premotor and prefrontal areas of the cerebral cortex in monkeys.
- 701 *Brain Res.* **784**, 228–238 (1998).
- 702 36. NN Foster, et al., The mouse cortico–basal ganglia–thalamic network. *Nature* **598**, 188–194
- 703 (2021).
- 704 37. K Dunovan, B Lynch, T Molesworth, T Verstynen, Competing basal ganglia pathways deter-
- 705 mine the difference between stopping and deciding not to go. *Elife* **4**, e08723 (2015).
- 706 38. C Vich, K Dunovan, T Verstynen, J Rubin, Corticostriatal synaptic weight evolution in a two-
- 707 alternative forced choice task: a computational study. *Commun. Nonlinear Sci. Numer. Simul.*
- 708 **82**, 105048 (2020).
- 709 39. EA Yttri, JT Dudman, Opponent and bidirectional control of movement velocity in the basal
- 710 ganglia. *Nature* **533**, 1–16 (2016).
- 711 40. BU Forstmann, et al., Cortico-striatal connections predict control over speed and accuracy in
- 712 perceptual decision making. *Proc. Natl. Acad. Sci.* **107**, 15916–15920 (2010).
- 713 41. TV Maia, MJ Frank, From reinforcement learning models to psychiatric and neurological
- 714 disorders. *Nat. neuroscience* **14**, 154–162 (2011).
- 715 42. TV Wiecki, I Sofer, MJ Frank, Hddm: hierarchical bayesian estimation of the drift-diffusion
- 716 model in python. *Front. neuroinformatics* **7**, 14 (2013).
- 717 43. KP Burnham, DR Anderson, Practical use of the information-theoretic approach in *Model*
- 718 *selection and inference*. (Springer), pp. 75–117 (1998).
- 719 44. I Gauthier, MJ Tarr, Becoming a “greble” expert: Exploring mechanisms for face recognition.
- 720 *Vis. research* **37**, 1673–1682 (1997).
- 721 45. C Vich, M Clapp, T Verstynen, J Rubin, Identifying control ensembles for decision-making
- 722 within the cortico-basal ganglia-thalamic circuit. (2021).
- 723 46. EA Yttri, JT Dudman, Opponent and bidirectional control of movement velocity in the basal
- 724 ganglia. *Nature* **533**, 402–406 (2016).
- 725 47. JT Dudman, JW Krakauer, The basal ganglia: From motor commands to the control of vigor.
- 726 *Curr. Opin. Neurobiol.* **37**, 158–166 (2016).
- 727 48. RS Turner, M Desmurget, Basal ganglia contributions to motor control: a vigorous tutor. *Curr.*
- 728 *opinion neurobiology* **20**, 704–716 (2010).
- 729 49. L Ding, JI Gold, Caudate encodes multiple computations for perceptual decisions. *J. Neurosci.*
- 730 **30**, 15747–15759 (2010).
- 731 50. W Wei, JE Rubin, XJ Wang, Role of the indirect pathway of the basal ganglia in perceptual
- 732 decision making. *J. Neurosci.* **35**, 4052–4064 (2015).
- 733 51. L Hurwicz, On informationally decentralized systems. *Decis. Organ.* p. 320 (1972).
- 734 52. JO Ledyard, Incentive compatibility in *Allocation, Information and Markets*. (Springer), pp.
- 735 141–151 (1989).
- 736 53. TV Wiecki, I Sofer, MJ Frank, Hddm: hierarchical bayesian estimation of the drift-diffusion
- 737 model in python. *Front. neuroinformatics* **7**, 14 (2013).
- 738 54. DJ Spiegelhalter, NG Best, BP Carlin, A Van Der Linde, Bayesian measures of model com-
- 739 plexity and fit. *J. royal statistical society: Ser. b (statistical methodology)* **64**, 583–639 (2002).
- 740 55. O Esteban, et al., fMRIprep: a robust preprocessing pipeline for functional MRI. *Nat. Methods*
- 741 **16**, 1111–1116 (2018).
- 742 56. J Diedrichsen, R Shadmehr, Detecting and adjusting for artifacts in fMRI time series data.
- 743 *NeuroImage* **27**, 624–634 (2005).
- 744 57. S Haufe, et al., On the interpretation of weight vectors of linear models in multivariate neu-
- 745 roimaging. *NeuroImage* **87**, 96 – 110 (2014).
- 746

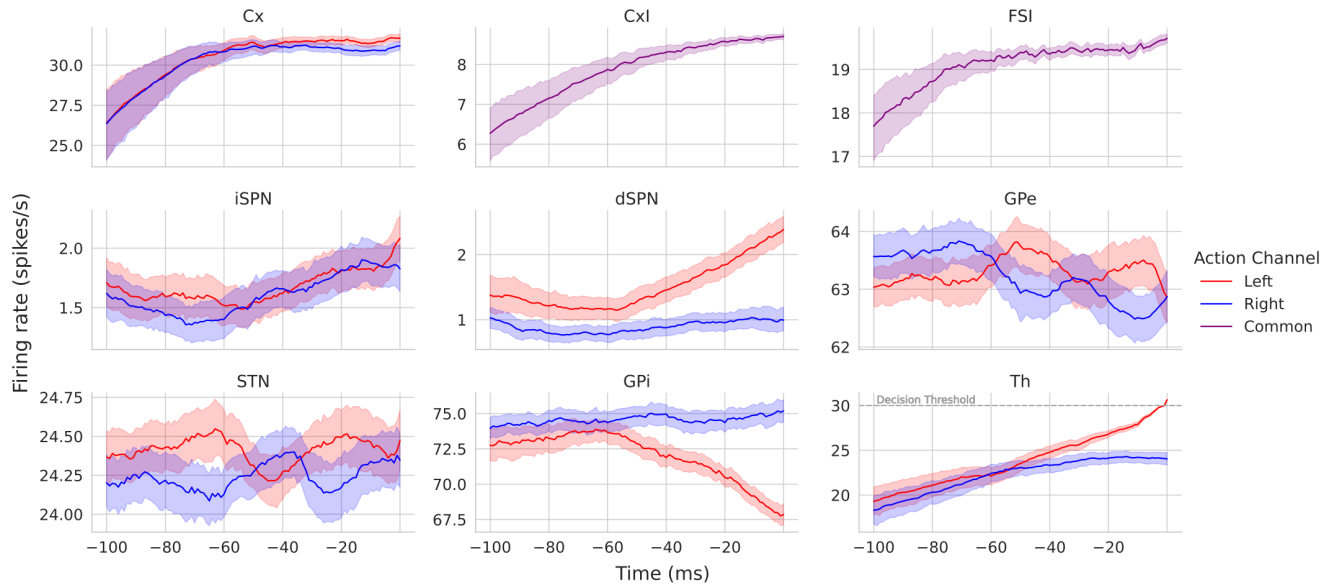

**Fig. S1. Simulated CBGT nuclei firing rates for a left decision.** Each panel shows the firing rates for each CBGT nucleus 100 ms prior to a left decision. The decision threshold for thalamus (30 spikes/second) is marked with a horizontal gray line. Note that the y axes have different limits for each nucleus due to differences of scale in their firing rates.

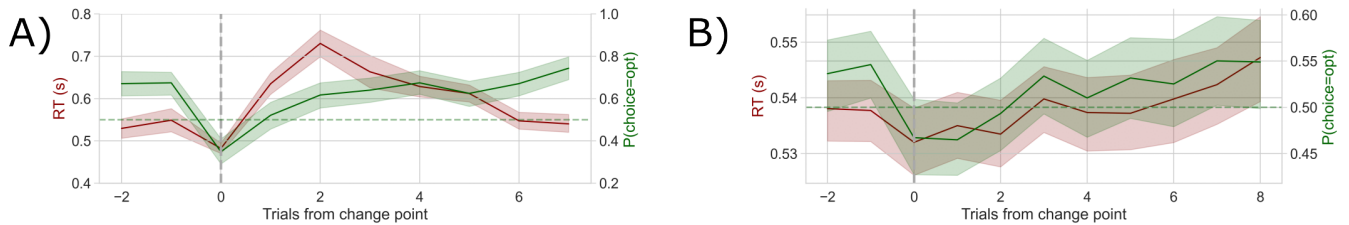

**Fig. S2. Simulated and human behavior.** Change point evoked reaction times are shown in red and accuracy, or the probability of selecting the optimally rewarding choice, is shown in green. Chance is marked as a green horizontal dashed line. The change point is marked by the vertical gray line. A) Simulated behavior. B) Human behavior.

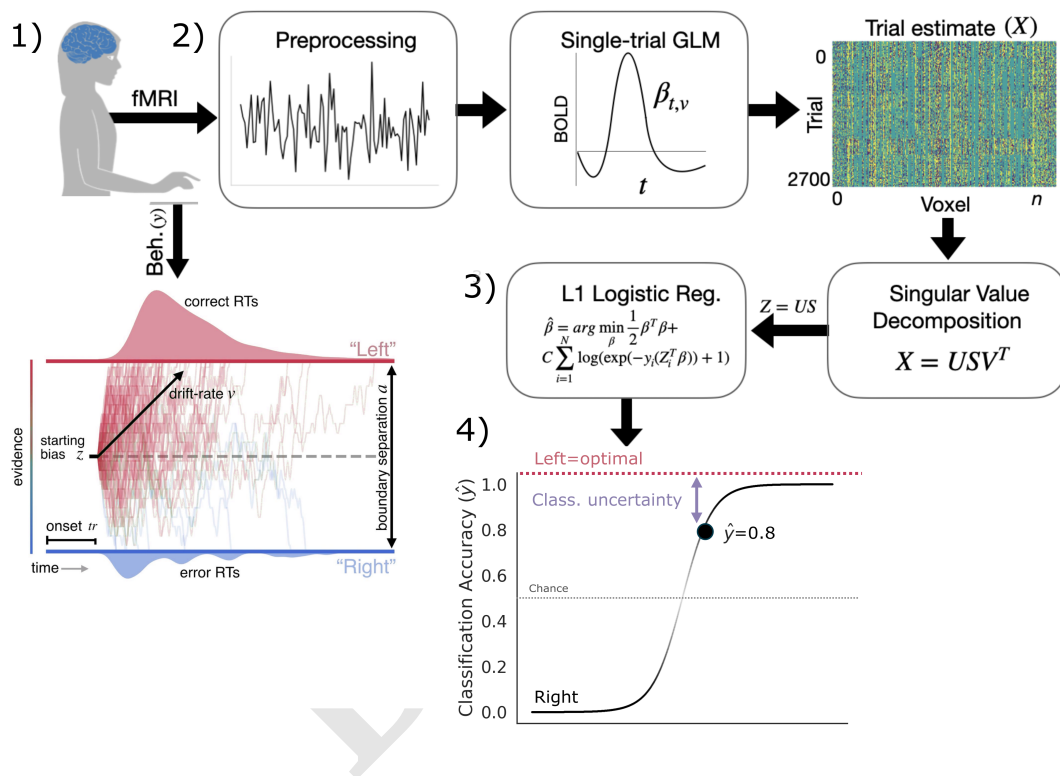

**Fig. S3. Analysis method.** Step 1. Behavioral response collection and DDM (Drift Diffusion Model) parameter estimation. In the case of the simulated CBGT network, this step involved simulating responses to experimental manipulations. Step 2. Preprocessing and single-trial estimates of the hemodynamic response. Step 3. Singular Value Decomposition and Logistic regression with an L1 penalty. After crossvalidation, this outputs a predicted response (left or right), here coded as 0 or 1. Step 4. Calculating classifier uncertainty from cross-validated response prediction. The further the predicted response from the inflection point of the logistic function, the more certain the prediction. The distance of this predicted response from the optimal choice represents classifier uncertainty for each trial. Here, the predicted probability of a left response  $\hat{y}_{i,1}$  is 0.2. The distance from the optimal choice on this trial, and, thereby, the classifier uncertainty is 0.2.

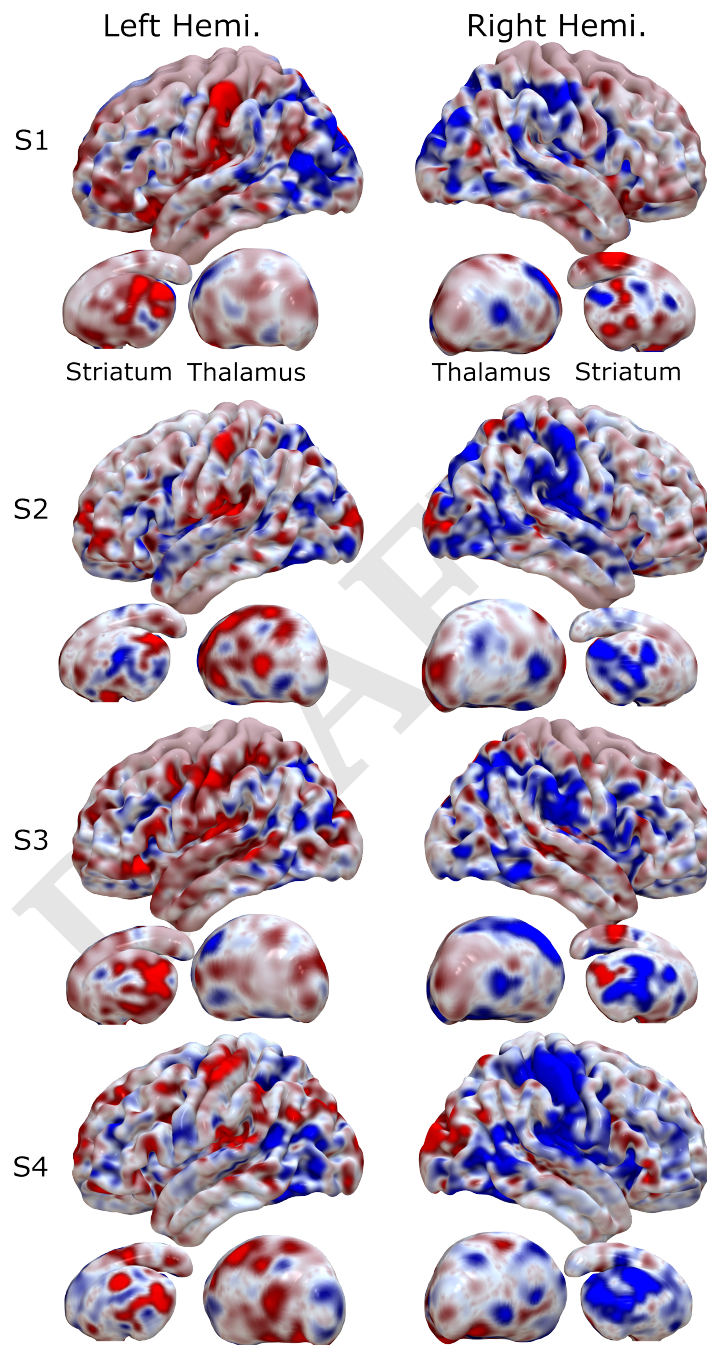

**Fig. S4.** Encoding maps in standardized space for each participant. Rows represent individual participants. Columns refer to left and right views of the whole brain. Thalamus and striatum are shown beneath each cortical map. Values are z-scored.



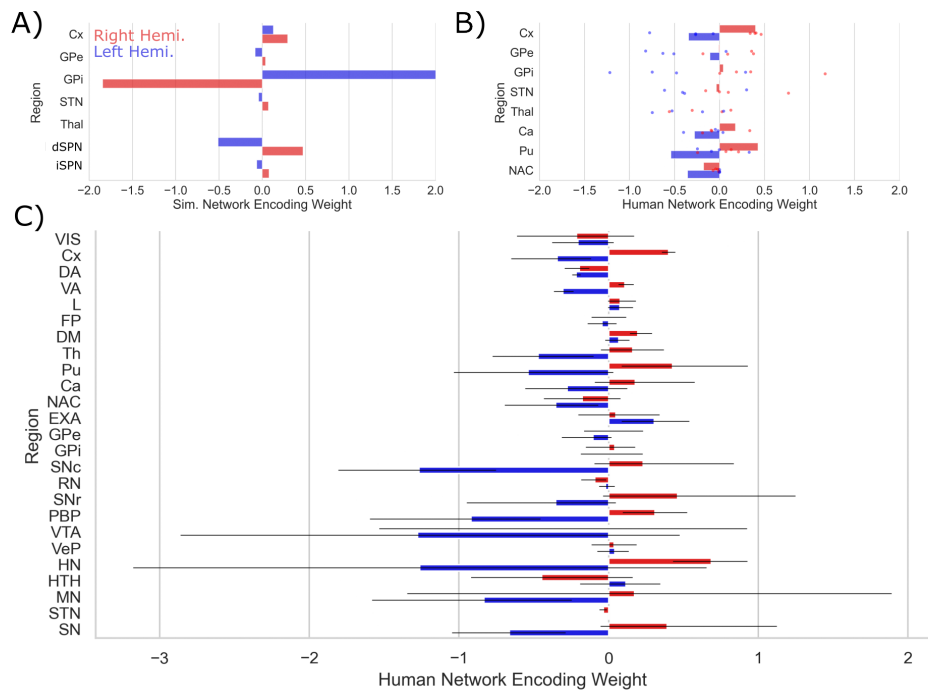

**Fig. S5. Encoding patterns by CBGT node.** A) Simulated CBGT encoding weights. B) Human CBGT encoding weights for comparison with the simulated CBGT network results. Each point represents the average result for each participant. Bars represent participant-averaged data. C) The full set of human CBGT encoding weights for all captured nodes from whole-brain imaging. Gray error bars represent 95% CIs over participants. Left hemisphere weights are marked in blue and right hemisphere weights are marked in red.

**Table S1. Behavior**

| Simulated  |               |          | Human       |               |          |
|------------|---------------|----------|-------------|---------------|----------|
| Sim. Part. | RT(s)         | Accuracy | Human Part. | RT (s)        | Accuracy |
| 1          | 0.604         | 0.59     | 1           | 0.553         | 0.538    |
| 2          | 0.559         | 0.624    | 2           | 0.537         | 0.541    |
| 3          | 0.608         | 0.61     | 3           | 0.531         | 0.553    |
| 4          | 0.596         | 0.648    | 4           | 0.54          | 0.511    |
| All        | 0.592 ± 0.176 | 0.618    | All         | 0.540 ± 0.076 | 0.536    |

DRAFT

**Table S2. Model fits**

| Simulated |            |          |                     |                     |
|-----------|------------|----------|---------------------|---------------------|
|           | $\Delta B$ | $\Omega$ | $\Delta DIC_{null}$ | $\Delta DIC_{best}$ |
| I         | v          | a        | -29.85 ± 12.76      | -4.49 ± 5.91        |
| II        | a          | v        | -23.94 ± 22.56      | -10.40 ± 11.22      |
| III       | -          | v        | -6.16 ± 4.24        | -28.19 ± 13.62      |
| IV        | v          | -        | -22.60 ± 7.28       | -11.74 ± 14.80      |
| V         | -          | a        | -7.04 ± 11.06       | -27.30 ± 8.16       |
| VI        | a          | -        | -17.72 ± 21.49      | -16.62 ± 11.88      |
| VII       | -          | -        | 0.00 ± 0.00         | -34.34 ± 15.97      |

  

| Human |            |          |                     |                     |
|-------|------------|----------|---------------------|---------------------|
|       | $\Delta B$ | $\Omega$ | $\Delta DIC_{null}$ | $\Delta DIC_{best}$ |
| I     | v          | a        | -14.90 ± 20.58      | -1.52 ± 1.04        |
| II    | a          | v        | -0.44 ± 1.11        | -15.99 ± 18.56      |
| III   | -          | v        | -1.47 ± 1.30        | -14.96 ± 18.56      |
| IV    | v          | -        | -13.80 ± 16.61      | -2.63 ± 3.62        |
| V     | -          | a        | -1.03 ± 4.46        | -15.40 ± 15.60      |
| VI    | a          | -        | 1.00 ± 0.71         | -17.42 ± 19.52      |
| VII   | -          | -        | 0.00 ± 0.00         | -16.43 ± 19.53      |

**Table S3. Human model fits by participant**

|     | Part. | $\Delta B$ | $\Omega$ | $\Delta DIC_{null}$ | $\Delta DIC_{best}$ |
|-----|-------|------------|----------|---------------------|---------------------|
| I   | 1     | v          | a        | 0.61                | -2.32               |
| II  | 1     | a          | v        | 0.08                | -1.79               |
| III | 1     | -          | v        | -1.71               | 0.00                |
| IV  | 1     | v          | -        | 1.13                | -2.84               |
| V   | 1     | -          | a        | -0.36               | -1.35               |
| VI  | 1     | a          | -        | 1.93                | -3.64               |
| VII | 1     | -          | -        | 0.00                | -1.71               |
| I   | 2     | v          | a        | -9.91               | -1.73               |
| II  | 2     | a          | v        | -0.69               | -10.95              |
| III | 2     | -          | v        | -1.17               | -10.47              |
| IV  | 2     | v          | -        | -11.64              | 0.00                |
| V   | 2     | -          | a        | 1.89                | -13.52              |
| VI  | 2     | a          | -        | 0.46                | -12.10              |
| VII | 2     | -          | -        | 0.00                | -11.64              |
| I   | 3     | v          | a        | -45.08              | 0.00                |
| II  | 3     | a          | v        | -1.85               | -43.23              |
| III | 3     | -          | v        | -3.07               | -42.01              |
| IV  | 3     | v          | -        | -37.41              | -7.68               |
| V   | 3     | -          | a        | -7.53               | -37.55              |
| VI  | 3     | a          | -        | 1.16                | -46.25              |
| VII | 3     | -          | -        | 0.00                | -45.08              |
| I   | 4     | v          | a        | -5.23               | -2.05               |
| II  | 4     | a          | v        | 0.71                | -7.99               |
| III | 4     | -          | v        | 0.07                | -7.35               |
| IV  | 4     | v          | -        | -7.28               | 0.00                |
| V   | 4     | -          | a        | 1.90                | -9.18               |
| VI  | 4     | a          | -        | 0.43                | -7.70               |
| VII | 4     | -          | -        | 0.00                | -7.28               |

## 747 Supplementary Methods

748 **Neuron model.** We used integrate-and-fire-or-burst model that models the membrane potential  $V(t)$  as

$$749 \quad C \frac{dV}{dt} = -g_L(V(t) - V_L) - g_T h(t) H(V(t) - V_h)(V(t) - V_T) - I_{syn}(t) - I_{ext}(t) \quad [5]$$

$$\frac{dh}{dt} = \begin{cases} \frac{-h(t)}{\tau_h^-} & , \text{ when } V(t) \geq V_h \\ \frac{(1-h(t))}{\tau_h^+} & , \text{ when } V(t) < V_h \end{cases}$$

750 where  $g_L$  represents the leak conductance,  $V_L$  is the leak reversal potential and the first term  $g_L(V(t) - V_L)$  is the leak current; a low  
751 threshold  $Ca^{2+}$  current with maximum conductance as  $g_T$ , gating variable  $h(t)$ , a heaviside function  $H$ , reversal potential  $V_T$ ;  $I_{syn}$  is the  
752 synaptic current and  $I_{ext}$  is the external current. This neuron model is capable of producing post inhibitory bursts, regulated by the  
753 gating variable that decays with the time constant  $\tau_h^-$ , when the membrane potential reaches a certain threshold  $V_h$  and rises with time  
754 constant  $\tau_h^+$ . However, when  $g_T$  is set to zero, the neuronal dynamics reduce to a leaky integrate and fire neuron. Currently, we model  
755 GPe and STN neuronal populations with bursty neurons and the remaining neuronal populations with leaky integrate-and-fire neurons,  
756 with conductance-based synapses.

757  
758 The synaptic current  $I_{syn}(t)$  consists of three components, two excitatory currents corresponding to AMPA and NMDA receptors and  
759 one inhibitory current corresponding to GABA receptors, and is calculated as below:

$$I_{syn} = g_{AMPA} s_{AMPA}(t)(V(t) - V_E) + \frac{g_{NMDA} s_{NMDA}(t)(V(t) - V_E)}{1 + e^{-0.062V(t)/3.57}} + g_{GABA} s_{GABA}(t)(V(t) - V_I)$$

where  $g_i$  represents the maximum conductance corresponding to the receptor  $i \in \{AMPA, NMDA, GABA\}$ ,  $V_I$  and  $V_E$  represent the  
excitatory and inhibitory reversal potentials, and  $s_i$  represents the gating variable for the channels, with dynamics given by:

$$\begin{aligned} \frac{ds_{AMPA}}{dt} &= \sum_j \delta(t - t_j) - \frac{s_{AMPA}}{\tau_{AMPA}} \\ \frac{ds_{NMDA}}{dt} &= \alpha(1 - s_{NMDA}) \sum_j \delta(t - t_j) - \frac{s_{NMDA}}{\tau_{NMDA}} \\ \frac{ds_{GABA}}{dt} &= \sum_j \delta(t - t_j) - \frac{s_{GABA}}{\tau_{GABA}} \end{aligned}$$

760 The gating variables for AMPA and GABA acts as leaky integrators that are increased by all incoming spikes, with an additional constraint  
761 for NMDA that ensures that the maximum value of  $s_{NMDA}$  remains below 1.

762 The values of neuronal parameters for all the nuclei are listed in Table S4, and the synaptic parameter values are listed in Table S5.  
763

**Table S4. Neuronal parameters**

| Parameter                                           | unit               | Cx  | Cxl | dSPN | iSPN | FSI | GPe  | STN  | Thalamus |
|-----------------------------------------------------|--------------------|-----|-----|------|------|-----|------|------|----------|
| $\tau_m$ (membrane time constant)                   | ms                 | 20  | 10  | 20   | 20   | 10  | 20   | 20   | 27.78    |
| $V_{rest}$ (resting membrane potential)             | mV                 | -70 | -70 | -70  | -70  | -70 | -70  | -70  | -70      |
| $V_{threshold}$ (threshold potential)               | mV                 | -50 | -50 | -50  | -50  | -50 | -50  | -50  | -50      |
| $V_L$ (leak reversal)                               | mV                 | -55 | -55 | -55  | -55  | -55 | -55  | -55  | -55      |
| $g_T$ (low threshold $Ca^{2+}$ maximal conductance) | mS/cm <sup>2</sup> | 0   | 0   | 0    | 0    | 0   | 0.06 | 0.06 | 0        |
| $V_h$ (threshold potential for burst activation)    | mV                 | -60 | -60 | -60  | -60  | -60 | -60  | -60  | -60      |
| $V_T$ ( $Ca^{2+}$ reversal potential)               | mV                 | 120 | 120 | 120  | 120  | 120 | 120  | 120  | 120      |
| $\tau_h^-$ (burst duration in ms)                   | ms                 | 20  | 20  | 20   | 20   | 20  | 20   | 20   | 20       |
| $\tau_h^+$ (hyperpolarization duration)             | ms                 | 100 | 100 | 100  | 100  | 100 | 100  | 100  | 100      |

764 **Spike timing dependent plasticity rule.** The plasticity rule we use is a dopamine modulated STDP rule also described in (38). All the values  
765 of the relevant parameters are listed in Table S8. The weight update of a corticostriatal synapse is controlled by three factors: 1) an  
766 eligibility trace, 2) the type of the striatal neuron (iSPN/dSPN), and 3) the level of dopamine.

To compute these quantities for a given synapse, an activity trace of each neuron in the pre-synaptic and post-synaptic populations is  
tracked via the equations

$$\begin{aligned} \tau_{PRE} \frac{dA_{PRE}}{dt} &= \Delta_{PRE} X_{PRE}(t) - A_{PRE}(t) \\ \tau_{POST} \frac{dA_{POST}}{dt} &= \Delta_{POST} X_{POST}(t) - A_{POST}(t) \end{aligned}$$

767 where  $X_{PRE}, X_{POST}$  are spike trains, such that  $A_{PRE}$  and  $A_{POST}$  maintain a filtered record of synaptic spiking of the pre/post neuron,  
768 respectively, with spike impact parameters  $\Delta_{PRE}, \Delta_{POST}$  and time constants  $\tau_{PRE}, \tau_{POST}$ .

769 If the post-synaptic spike follows the spiking activity of the pre-synaptic population closely enough in time, then eligibility trace ( $E$ )  
770 increases and allows for plasticity to occur. On the other hand, if a pre-synaptic spike follows the spiking activity of the post-synaptic



population, then  $E$  decreases. In absence of any activity and spikes, the eligibility trace decays to zero with a time constant  $\tau_E$ . Putting these effects together, we obtain the equation

$$\tau_E \frac{dE}{dt} = X_{POST}(t)A_{PRE}(t) - X_{PRE}(t)A_{POST}(t) - E.$$

The synaptic weight update depends on the dopamine receptor type of the striatal neuron; that is, if the neuron is a dSPN or iSPN. We assume that a phasic dopamine release promotes long term potentiation (LTP) in dSPNs and long term depression (LTD) in iSPNs. This factor is indicated by the learning rate parameter  $\alpha_w$ , which is set to a positive value for dSPNs and a negative value for iSPNs. The weight update dynamics is given by:

$$\frac{dw}{dt} = [\alpha_{w-X}E(t)f_X(K_{DA})(W_{max}^X - w)]^+ + [\alpha_{w-X}E(t)f_X(K_{DA})(w - W_{min})]^- \quad [6]$$

where  $X \in \{dSPN, iSPN\}$  with  $\alpha_{w-dSPN} > 0$  and  $\alpha_{w-iSPN} < 0$ . Here, the weights of the corticostriatal synapses are bounded between the maximal value  $W_{max}^X$ , which depends on the SPN type, and a minimal value of  $W_{min} = 0.001$ . The precise values used for all relevant parameters are listed in Table S8.

In the weight update rule Eq. (6),  $K_{DA}$  represents the dopamine level present. This quantity changes as a result of phasic release of dopamine (increments of size  $DA_{inc}$ ), which is correlated to the reward prediction error encountered in the environment. The parameter  $C_{scale}$  defines the scaling between the reward prediction error and the amount of dopamine released, and  $K_{DA}$  obeys the equation

$$\tau_{DOP} \frac{dK_{DA}}{dt} = C_{scale}(DA_{inc}(t) - K_{DA})\delta(t) - K_{DA},$$

where

$$DA_{inc}(t) = r(t) - Q_{chosen}(t)$$

for reward  $r(t)$  and expected value  $Q_{chosen}(t)$  of the chosen action. Trial-by-trial estimates of the values of the actions (left/right) are maintained by a simple Q-update rule:

$$Q_a(t+1) = Q_a(t) + \alpha_q(r(t) - Q_a(t))$$

where  $a \in \{\text{left, right}\}$  and where  $\alpha_q$  represents the learning rate of the Q-values. Finally, the function  $f_X(K_{DA})$  converts the level of dopamine into an impact on plasticity in a way that depends on the identity  $X$  of the post-synaptic neuron, as follows:

$$f_X(K_{DA}) = \begin{cases} K_{DA}, & X = dSPN, \\ \frac{K_{DA}}{c + |K_{DA}|}, & X = iSPN, \end{cases}$$

where  $c$  sets the dopamine level where  $f_{iSPN}$  reaches half-maximum.

**Table S5. External input to the CBGT populations**

| Population | Receptor | External input mean frequency | External input efficacy | Number of external connections |
|------------|----------|-------------------------------|-------------------------|--------------------------------|
| CxI        | AMPA     | 3.7                           | 1.2                     | 640                            |
| Cx         | AMPA     | 2.3                           | 2.0                     | 800                            |
| dSPN       | AMPA     | 1.3                           | 4.0                     | 800                            |
| iSPN       | AMPA     | 1.3                           | 4.0                     | 800                            |
| FSI        | AMPA     | 3.6                           | 1.55                    | 800                            |
| GPI        | AMPA     | 0.8                           | 5.9                     | 800                            |
| GPe        | AMPA     | 4                             | 2.0                     | 800                            |
| GPe        | GABA     | 2                             | 2.0                     | 2000                           |
| STN        | AMPA     | 4.45                          | 1.65                    | 800                            |
| Thalamus   | AMPA     | 2.2                           | 2.5                     | 800                            |

**Table S6. Synaptic parameters**

| Parameter            | unit | Value  |
|----------------------|------|--------|
| $\tau_{\text{AMPA}}$ | ms   | 2      |
| $V_{\text{E}}$       | mV   | 0      |
| $\tau_{\text{NMDA}}$ | ms   | 100    |
| $\tau_{\text{GABA}}$ | ms   | 5      |
| $V_{\text{I}}$       | mV   | -70    |
| $\alpha$             | -    | 0.6332 |

**Table S7. CBGT connectivity**

| Connection type | Connection probability | g (nS) | Receptor |
|-----------------|------------------------|--------|----------|
| Cx-dSPN         | 1.0                    | 0.015  | AMPA     |
| Cx-dSPN         | 1.0                    | 0.02   | NMDA     |
| Cx-iSPN         | 1.0                    | 0.015  | AMPA     |
| Cx-iSPN         | 1.0                    | 0.02   | NMDA     |
| Cx-FSI          | 1.0                    | 0.43   | AMPA     |
| Cx-Th           | 1.0                    | 0.025  | AMPA     |
| Cx-Th           | 1.0                    | 0.035  | NMDA     |
| Cx-Cx           | 0.13                   | 0.0127 | AMPA     |
| Cx-Cx           | 0.13                   | 0.08   | NMDA     |
| Cx-Cxl          | 0.0725                 | 0.113  | AMPA     |
| Cx-Cxl          | 0.0725                 | 0.525  | NMDA     |
| Cxl-Cx          | 0.5                    | 1.05   | GABA     |
| Cxl-Cxl         | 1.0                    | 1.075  | GABA     |
| dSPN-dSPN       | 0.45                   | 0.28   | GABA     |
| dSPN-iSPN       | 0.45                   | 0.28   | GABA     |
| dSPN-GPi        | 1.0                    | 2.09   | GABA     |
| iSPN-iSPN       | 0.45                   | 0.28   | GABA     |
| iSPN-dSPN       | 0.5                    | 0.28   | GABA     |
| iSPN-GPe        | 1.0                    | 4.07   | GABA     |
| FSI-FSI         | 1.0                    | 3.2583 | GABA     |
| FSI-dSPN        | 1.0                    | 1.77   | GABA     |
| FSI-iSPN        | 1.0                    | 1.66   | GABA     |
| GPe-GPe         | 0.067                  | 1.75   | GABA     |
| GPe-STN         | 0.067                  | 0.35   | GABA     |
| GPe-GPi         | 1.0                    | 0.058  | GABA     |
| STN-GPe         | 0.1617                 | 0.07   | AMPA     |
| STN-GPe         | 0.1617                 | 1.51   | NMDA     |
| STN-GPi         | 1.0                    | 0.038  | GABA     |
| GPi-Th          | 1.0                    | 0.033  | GABA     |
| Th-dSPN         | 1.0                    | 0.38   | AMPA     |
| Th-iSPN         | 1.0                    | 0.38   | AMPA     |
| Th-FSI          | 0.83                   | 0.1    | AMPA     |
| Th-Cx           | 0.83                   | 0.03   | NMDA     |

**Table S9. STDP parameters**

| Parameter               | Value |
|-------------------------|-------|
| $\Delta_{\text{PRE}}$   | 0.8   |
| $\Delta_{\text{POST}}$  | 0.04  |
| $\tau_{\text{PRE}}$     | 15    |
| $\tau_{\text{POST}}$    | 6     |
| $\tau_{\text{E}}$       | 100   |
| $\alpha_{w-dSPN}$       | 39.5  |
| $\alpha_{w-iSPN}$       | -38.2 |
| $W_{\text{max}}^{dSPN}$ | 0.055 |
| $W_{\text{max}}^{iSPN}$ | 0.035 |
| $W_{\text{min}}$        | 0.001 |
| $c$                     | 2.5   |
| $\tau_{\text{DOP}}$     | 2.0   |
| $\alpha_q$              | 0.6   |
| $C_{\text{scale}}$      | 85    |

**Table S8. Number of neurons in each CBGT population**

| Population | Number of neurons |
|------------|-------------------|
| Cx         | 204               |
| Cxl        | 186               |
| dSPN       | 75                |
| iSPN       | 75                |
| FSI        | 75                |
| GPe        | 750               |
| GPi        | 75                |
| STN        | 750               |
| Th         | 75                |
